# Supplementary material
Source: publisher figshare collection journal article supplement (https://springernature.figshare.com/ndownloader/files/23521297)
Supplement: Supplementary file 1 [file 23521297]

Supplementary Table S1 The schedule of fertilization in this experiment (g m-2)

| Treatments | Before transplanting as basal fertilizer | | | Tillering | Heading |
| --- | --- | --- | --- | --- | --- |
| P2O5 (Compound fertilizer) | K2O (Compound fertilizer) | N (Urea) | N (Urea) | N (Urea) |
| 0N | 9 | 9 | - | - | - |
| NN | 9 | 9 | 9 | 6.75 | 6.75 |

0N, control; NN, 22.5 g total N m-2
